# Supplementary material for: Improvement of enzymatic saccharification yield in Arabidopsis thaliana by ectopic expression of the rice SUB1A-1 transcription factor
Source: PubMed Central journal article supplement (PMC4358655; doi:10.7717/peerj.817), 2015-03-03

**Wild-Type  
(Col-0)**

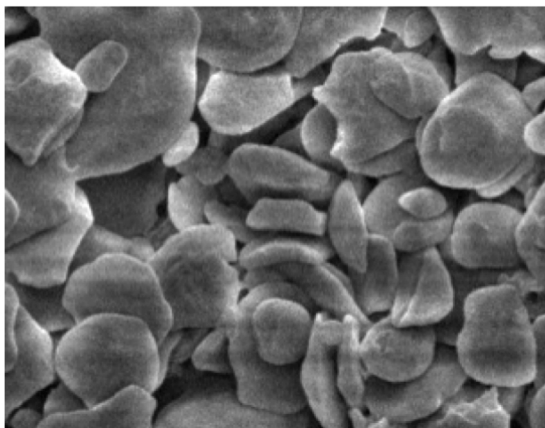

**OxSUB1A-L5**

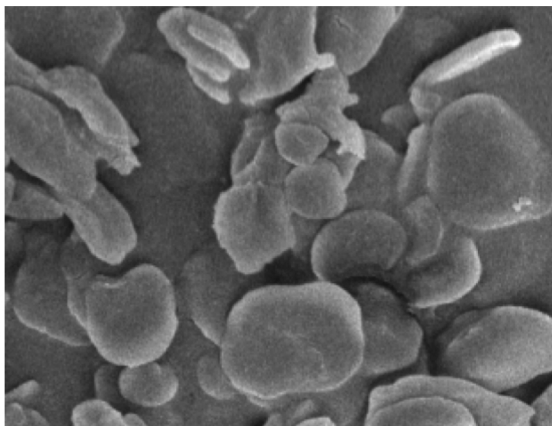

**OxSUB1A-L12**

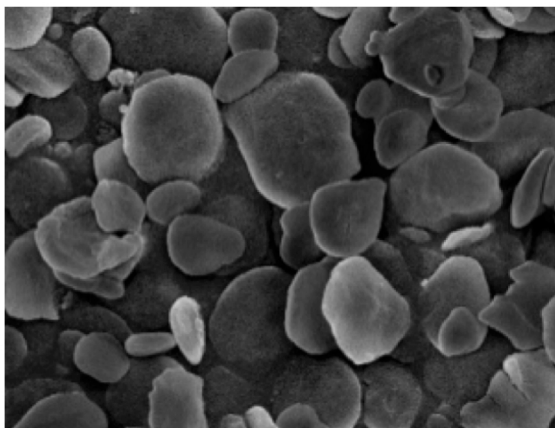

Supplement: peerj-03-817-s002.pdf [file peerj-03-817-s002.pdf]
