# Supplementary material for: Improvement of enzymatic saccharification yield in Arabidopsis thaliana by ectopic expression of the rice SUB1A-1 transcription factor
Source: PubMed Central journal article supplement (PMC4358655; doi:10.7717/peerj.817), 2015-03-03

**(A)**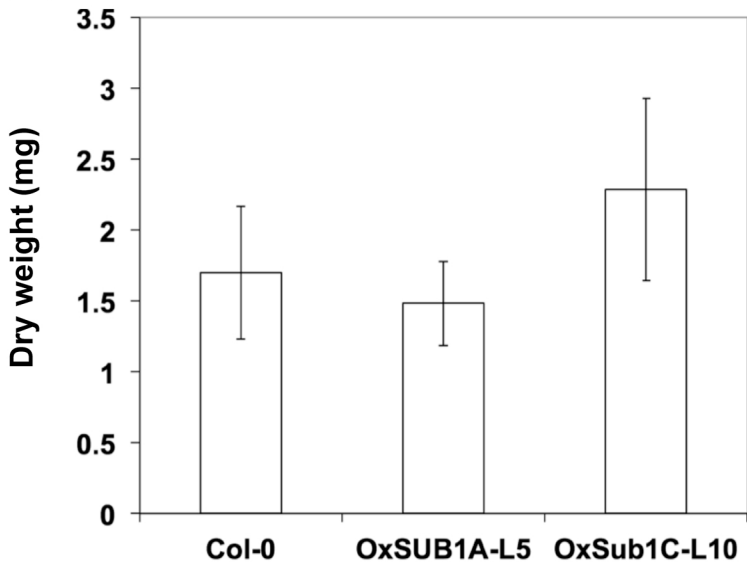**(B)**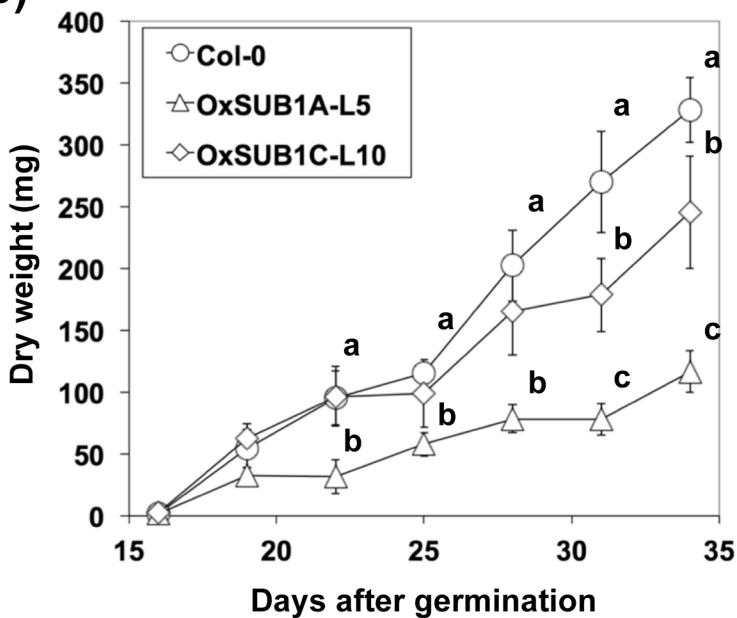

Supplement: peerj-03-817-s003.pdf [file peerj-03-817-s003.pdf]
