# Supplementary material for: Improvement of enzymatic saccharification yield in Arabidopsis thaliana by ectopic expression of the rice SUB1A-1 transcription factor
Source: PeerJ. 2015 Mar 3;3:e817. doi: 10.7717/peerj.817 (PMC4358655; doi:10.7717/peerj.817)
Supplement: Supplemental Information 8 [file peerj-03-817-s008.xlsx]

## Sheet: Fig. 3
Starch g 100g-1 FW		0h	8h	16h	20h	24h
		0.1933	0.9248	0.5802	0.3498	0.6642
		0.1871	0.8774	0.5706	0.3122	0.5688
	Exp 1	0.2136	0.9316	0.7017	0.3049	0.545
		0.2281	0.93	0.7677	0.3304	0.4771
		0.2349	0.7284	0.7103	0.2709	0.654
		0.422	0.9254	1.138	0.9172	0.5
		0.3423	0.9506	1.1591	0.9574	0.5252
Columbia 0	Exp 2	0.4209	0.9459	1.1623	0.9554	0.4979
(Wt)		0.464	0.938	1.1658	0.9736	0.5744
		0.4306	0.9307	1.2082	0.9138	0.5506
		0.3828	1.0515	1.1752	0.4703	0.4059
		0.3532	0.9811	0.9494	0.582	0.4418
	Exp 3	0.5465	0.9409	0.9706	0.3992	0.3001
		0.3793	0.8437	1.0398	0.4486	0.5284
		0.3869	0.8806	0.9032	0.7237	0.4451
		0.5364	1.2748	1.4537	1.2413	1.1447
		0.5156	1.3023	1.3485	0.9189	1.1373
	Exp 1	0.76	1.3227	1.5535	1.155	1.1476
		0.8083	1.2327	1.6263	1.1338	1.1697
		0.5428	1.4372	1.6363	1.2114	1.225
		1.3317	1.721	2.045	1.725	1.2467
		1.2407	1.6204	2.397	1.8344	1.3184
OxSUB1A-L5	Exp 2	1.0034	1.7841	2.3782	1.7735	1.3464
		0.9937	1.6865	2.1835	1.753	1.3883
		1.0672	1.7365	2.3811	1.7731	1.2383
		0.8726	1.6706	2.23803	1.773	1.3801
		0.9704	1.6643	2.2353	2.0105	1.3326
	Exp 3	1.0405	1.6669	2.2424	1.6239	1.8132
		0.8788	1.8121	2.2211	1.5982	1.49
		0.9403	1.7407	2.2201	1.6837	1.6006
		0.4409	1.0574	1.0292	0.4672	0.6653
		0.4003	0.9377	0.8768	0.4666	0.6704
	Exp 1	0.4832	0.9824	1.0361	0.2709	0.8122
		0.2382	0.8893	1.0325	0.3351	0.6314
		0.3283	0.8851	1.0297	0.479	0.6753
		0.4068	0.9492	1.4006	1.3444	0.7535
		0.4776	1.0395	1.328	1.1794	0.7191
OxSUB1A-L12	Exp 2	0.4225	1.0365	1.3046	1.2151	0.7408
		0.4034	0.9761	1.4028	1.143	0.7274
		0.5232	0.959	1.2981	1.1395	0.7611
		0.7255	1.2385	1.2581	0.7171	0.9926
		0.6905	1.1598	1.2408	0.8577	0.631
	Exp 3	0.5888	1.166	1.4962	0.8694	0.6351
		0.608	1.167	1.3973	0.7949	0.699
		0.6128	1.1458	1.3837	0.9307	0.6354

## Sheet: Fig. 4
Starch g 100g-1 FW		18d				21d				27d				31d
		WT	OxSUB1A-L5	OxSUB1A-L12		WT	OxSUB1A-L5	OxSUB1A-L12		WT	OxSUB1A-L5	OxSUB1A-L12		WT	OxSUB1A-L5	OxSUB1A-L12
	1	0.640414	1.48116	1.00736		2.53078	2.23999	1.11939		0.564756	1.17967	1.031		1.81965	1.12832	1.07781
	2	0.65201	1.6392	1.06078		3.41874	2.6481	2.78726		0.629577	0.908851	1.1661		1.2366	1.25992	1.44045
Exp 1	3	0.640414	1.38345	1.17157		1.44467	3.24323	3.31593		0.78197	1.64797	1.21373		1.02466	0.883138	1.4181
	4	0.592785	0.6246	0.84932		3.14897	3.6169	2.54387		0.757845	1.51338	1.37625		1.91883	1.01929	0.709151
	5	0.756378	1.32805	1.1608		1.33998	2.08587	2.54387		1.20749	1.42271	0.950193		2.29817	1.31937	1.28561
	6	0.688009	1.34925	1.5		1.22039	1.67117	2.81156		1.3562	1.45929	1.1141		0.974843	1.28991	1.10276
	7	0.583229	1.18342	1.4397		1.86157	2.89241	1.32695		0.968163	1.51117	1.05229		1.37377	0.713849	1.34101
Exp 2	8	0.675013	1.45477	0.976421		1.66854	1.85762	1.38096		1.3384	1.26198	1.15043		1.1751	1.31282	1.43454
	9	0.565327	2.16332	0.957286		1.59946	1.80094	1.23029		1.27204	1.14083	1.16494		0.496264	1.5878	0.852907
	10	0.559673	1.6206	0.914573		1.91817	2.56757	1.58971		0.938139	1.6194	1.33932		1.11146	1.35296	1.15734
	11	0.516332	2.71734	1.06736		1.22864	2.33836	2.165		1.32669	1.53298	1.1936		1.05188	1.72464	1.1479
	12	0.560999	2.02387	1.41248		1.31937	1.97487	2.3508		1.86986	1.89914	1.5312		1.29188	1.37735	1.10854
Exp 3	13	0.56748	1.88658	1.51131		1.07789	2.45729	1.9002		1.52475	1.80492	1.7351		1.4242	1.3706	1.13505
	14	0.65871	2.49121	1.23241		1.0402	2.39419	1.1971		1.4824	2.38154	1.0999		1.15556	1.15616	1.00608
	15	0.541457	2.28141	1.14447		1.35427	2.3593	1.7791		1.12276	1.63561	1.6497		1.07612	1.17457	1.35178

## Sheet: Fig. 5
Force (Newton)						Cycle threshold (Ct)		Experiment 1				Experiment 2
WT	OxSUB1A-L5	OxSUB1A-L12	OxSUB1C-L6	OxSUB1C-L10			TUB2	BGL2	EXP2		TUB2	BGL2	EXP2
3.14	2.65	2.18	3.19	2.43		WT	19.77	28.77	33.21		20.38	28.69	33.25
3.77	2.37	2.2	3.52	3.51			19.45	28.82	33.13		19.82	28.77	33.79
3.08	3.02	2.92	3.12	3.12			19.47	28.98	33.63		19.73	28.85	33.26
3.84	2.31	2.37	2.98	2.96		WT	19.11	28.85	32.89		19.76	28.75	31.71
3.53	1.98	2.49	2.9	2.96			18.93	28.74	32.61		19.54	28.79	32.26
3.1	1.96	2.43	2.8	2.72			19	28.82	32.75		19.42	28.83	32.46
3.37	1.78	2.38	3.03	2.6		OxSUB1A-L5	19	24.81	29.07		19.8	24.53	29.53
3.58	2.69						18.99	24.72	29.34		19.46	24.68	29.19
4.2							19.22	24.87	29.67		19.35	24.77	29.44
3.2						OxSUB1A-L12	19.06	23.17	28.5		20.26	23.5	28.47
3.37							19.06	23.05	28.75		20.04	23.45	28.56
3.82							19.13	23.19	28.65		19.92	23.62	28.64
						OxSUB1C-L6	19.34	29.15	31.54		20.1	28.97	30.66
							19.18	29.2	31.19		19.63	29.03	30.34
							19.26	29.63	31.09		19.64	29	31.03
						OxSUB1C-L10	19.04	28.03	32.9		19.93	28.14	32.28
							19	27.83	32.13		19.68	28.05	32.74
							19.16	28.05	32.82		19.61	27.93	31.71

## Sheet: Table 1
	DNS	(Absorbance)							Cell wall	(mg of glucose g-1 FW)							Starch Content (g 100g-1 FW)
	WT1	OxSUB1A-L5	OxSUB1A-L12	WT2	OxSUB1C-L6	OxSUB1C-L10			WT1	OxSUB1A-L5	OxSUB1A-L12	WT2	OxSUB1C-L6	OxSUB1C-L10			Starch	Wt	OxSUB1A-L5	OxSUB1A-L12
	0.178	0.251	0.171	0.139	0.171	0.118			0.0924	0.0918	0.0943	0.1206	0.0722	0.0827			1	0.501335	1.65568	1.49613
	0.163	0.209	0.155	0.121	0.165	0.116			0.091	0.072	0.0836	0.0995	0.1213	0.0728			2	0.63094	1.6001	1.58981
Exp 1	0.18	0.213	0.156	0.183	0.188	0.125		Exp 1	0.1127	0.0855	0.0739	0.0868	0.0652	0.0592		Exp 1	3	0.650013	1.02563
	0.169	0.143	0.177	0.122	0.196	0.148			0.1127	0.0879			0.0683	0.0695			4	1.00159	1.07851	1.16898
	0.172	0.14	0.164	0.128	0.128	0.122			0.0909	0.061	0.076	0.0928	0.0642	0.0609			5	0.502324	0.522553	0.952225
	0.137	0.192	0.145	0.191	0.122	0.112			0.0894	0.1116	0.1671	0.0634	0.0795	0.0783			6	0.95154	2.10589	1.94633
	0.134	0.223	0.168	0.18	0.183	0.142			0.1129	0.1534	0.1325	0.0938	0.1364	0.0396			7	1.08114	2.05031	2.04002
Exp 2	0.173	0.189	0.166	0.131	0.131	0.125		Exp 2	0.1139	0.1415		0.1079	0.1714			Exp 2	8	1.10022	1.47583
	0.097	0.231	0.142	0.119	0.19	0.129			0.0756	0.1401	0.1378	0.1141	0.1031	0.036			9	1.45179	1.52872	1.61918
	0.095	0.259	0.162	0.197	0.126	0.115			0.108	0.1353	0.1411	0.1205	0.132	0.0599			10	0.952529	0.972758	1.40243
									0.0987	0.1429	0.1775						11	0.456623	0.750177	0.819279
									0.148	0.1718	0.1731						12	0.514716	0.921338	0.76409
								Exp 3	0.0849	0.1348	0.1643					Exp 3	13	0.48323	0.78221
									0.0897	0.1224	0.1233						14	0.526687	0.70429	0.801749
									0.0784	0.0982	0.1048						15	0.442086	0.644219	0.944001
																	16	0.580244	1.4538	1.02924
																	17	0.57068	1.34859	0.876842
																Exp 4	18	0.701772	1.55358	1.03615
																	19	0.767738	1.62634	1.03255
																	20	0.710399	1.63638	1.02977
																	21	1.13805	2.04508	1.40068
																	22	1.15914	2.397	1.32809
																Exp 5	23	1.16238	2.37825	1.30468
																	24	1.16585	2.18354	1.40288
																	25	1.20825	2.38117	1.29815
																	26	1.17529	2.23803	1.25819
																	27	0.949469	2.23534	1.24089
																Exp 6	28	0.970615	2.24243	1.49629
																	29	1.03986	2.22116	1.39732
																	30	0.903283	2.22016	1.38371

## Sheet: Supp. Fig. 1
Sampling	Genotypes	Exp1	Exp2	(mg of glucose g-1 FW)
	WT	0.0272	0.0283
		0.03	0.0285
		0.0217	0.03163
0h	OxSUB1AL-5	0.0236	0.0214
		0.0269	0.024
		0.0199	0.0292
	WT	0.121	0.1378
		0.1467	0.1371
		0.1129	0.1298
6 h	OxSUB1AL-5	0.17	0.1729
		0.16439	0.1751
		0.1608	0.173
	WT	0.1319	0.1494
		0.1667	0.1444
		0.1374	0.1378
12 h	OxSUB1AL-5	0.1779	0.1926
		0.1899	0.1847
		0.1608	0.1899
	WT	0.1346	0.1532
		0.1567	0.1473
		0.1346	0.1491
24 h	OxSUB1AL-5	0.1858	0.1923
		0.1743	0.1865
		0.1853	0.1901
	WT	0.1374	0.1462
		0.1717	0.1401
		0.1374	0.148
36 h	OxSUB1AL-5	0.1873	0.1862
		0.1643	0.1892
		0.1853	0.19

## Sheet: Suppl. Fig. 3
Dry weight (mg)	16d
WT	0.0023	0.0014	0.0025	0.0015	0.0011	0.0015	0.002	0.001	0.0015	0.0021	0.002	0.0015
	0.0019	0.0011	0.0023	0.0015	0.0011	0.0018	0.0019	0.0021	0.0015	0.0032
OxSUB1A-L5	0.0012	0.0015	0.0017	0.0011	0.0016	0.0014	0.0011	0.0012	0.0016	0.0016	0.0021	0.0017
	0.0017	0.0027	0.0013	0.0023	0.0018	0.0013	0.0012	0.0014	0.0019	0.0017	0.0015	0.0008
OxSUB1C-L10	0.0021	0.0025	0.0034	0.0022	0.0015	0.003	0.0019	0.0029	0.0028	0.0014	0.0021	0.0016
	0.0021	0.0018	0.0039	0.0039	0.0037	0.0025	0.0014	0.0032	0.0031	0.0025
Dry weight (mg)
WT
19d	0.0671	0.0717	0.0593	0.0336	0.0551	0.0392
22d	0.0917	0.0701	0.1092	0.1266	0.1018	0.0722
25d	0.1088	0.1207	0.1104	0.1154	0.1075	0.1295
28d	0.1964	0.245	0.2096	0.1952	0.1653
31d	0.3153	0.2174	0.281	0.2654	0.2503
34d	0.3501	0.3034	0.3627	0.2846	0.35	0.3184	0.33	0.3257
OxSUB1A-L5
19d	0.024	0.0372	0.0371	0.0373	0.0272
22d	0.0244	0.0215	0.0253	0.0277	0.0335	0.0584
25d	0.0672	0.0455	0.0635	0.0554	0.5392
28d	0.0814	0.0733	0.0635	0.0766	0.0788	0.0974
31d	0.079	0.0837	0.0823	0.0765	0.0541	0.0921
34d	0.1285	0.1047	0.1151	0.0917	0.12
OxSUB1C-L10
19d	0.0573	0.0484	0.0767	0.0738	0.0692	0.0655	0.0449
22d	0.0786	0.0888	0.1087	0.0624	0.1218	0.1202
25d	0.073	0.1576	0.1027	0.0836	0.0942	0.097	0.0849
28d	0.1372	0.2095	0.1713	0.19	0.177	0.1708	0.1027
31d	0.1717	0.2336	0.1805	0.1552	0.1395	0.1805	0.1897
34d	0.287	0.1569	0.274	0.2763	0.27	0.2064	0.2245	0.2687
